# Supplementary material for: Community profiling and gene expression of fungal assimilatory nitrate reductases in agricultural soil
Source: PubMed Central journal article supplement — ISME J. 2011 May 12;5(11):1771–83. doi: 10.1038/ismej.2011.53 (PMC3197165; doi:10.1038/ismej.2011.53), 2011-05-12
Supplement: ismej201153x4.pdf [file ismej201153x4.pdf]

| Phyl. | Strain                                              | Acc. Nr.                        | Cons. | Reference                       |
|-------|-----------------------------------------------------|---------------------------------|-------|---------------------------------|
| A     | <i>Ajellomyces dermatitidis</i> ER-3                | EEQ88796 <sup>1</sup>           | FGI   | BDSP                            |
| A     | <i>Ajellomyces dermatitidis</i> SLH14081            | EEQ72680 <sup>1</sup>           | FGI   | BDSP                            |
| A     | <i>Arthroderma benhamiae</i> CBS112371              | EFE34296                        | HKI   | DCSP                            |
| A     | <i>Arxula adenivorans</i> LS3                       | CAQ77148                        |       | Boer <i>et al.</i> 2009         |
| A     | <i>Aspergillus clavatus</i> NRRL 1                  | EAW07550                        | JCVI  | Fedorova <i>et al.</i> 2008     |
| A     | <i>Aspergillus flavus</i> NRRL3357                  | EED54629                        | JCVI  | ACSP                            |
| A     | <i>Aspergillus fumigatus</i>                        | AAL85636                        |       |                                 |
| A     | <i>Aspergillus fumigatus</i> A1163                  | EAW07550                        | JCVI  | Fedorova <i>et al.</i> 2008     |
| A     | <i>Aspergillus fumigatus</i> Af293                  | EAL90615                        | TIGR  | Nierman <i>et al.</i> 2005      |
| A     | <i>Aspergillus nidulans</i> FGSC A4                 | EAA65574                        | FGI   | Galagan <i>et al.</i> 2005      |
| A     | <i>Aspergillus niger</i>                            | P36858                          |       | Unkles <i>et al.</i> 1992       |
| A     | <i>Aspergillus niger</i> ATCC 1015                  | 208048 (JGI)                    | JGI   | Baker 2006                      |
| A     | <i>Aspergillus niger</i> CBS513.88                  | CAK45533                        | DSM   | Pel <i>et al.</i> 2007          |
| A     | <i>Aspergillus oryzae</i> KBN616                    | BAA08551                        |       | Kitamoto <i>et al.</i> 1995     |
| A     | <i>Aspergillus parasiticus</i> ATCC56775            | AAC49605 <sup>1</sup>           |       | Chang <i>et al.</i> 1996        |
| A     | <i>Aspergillus terreus</i> NIH2624                  | EAU39120                        | FGI   | ACSP                            |
| A     | <i>Botryotinia fuckeliana</i> B05.10                | EDN30738                        | FGI   |                                 |
| A     | <i>Botryotinia fuckeliana</i> T4                    | AAC02633                        |       | Levis <i>et al.</i> 1997        |
| A     | <i>Chaetomium globosum</i> CBS148.51                | EAQ88219 <sup>1</sup>           | FGI   |                                 |
| A     | <i>Cochliobolus heterostrophus</i> C5               | 113444 (JGI)                    | JGI   |                                 |
| A     | <i>Cordyceps bassiana</i> Bb147                     | CAA59336                        |       | Maurer <i>et al.</i> 1997       |
| A     | <i>Fusarium oxysporum</i> f. sp. <i>lycopersici</i> | FOXG_04181.2 (FGI)              | FGI   | Ma <i>et al.</i> 2010           |
| A     | <i>Fusarium oxysporum</i> Fom24                     | CAA80270                        |       | Diolez <i>et al.</i> 1993       |
| A     | <i>Fusarium oxysporum</i> JCM11502                  | BAG12905                        |       | Fujii and Takaya 2008           |
| A     | <i>Fusarium oxysporum</i> M10                       | BAG12906                        |       |                                 |
| A     | <i>Fusarium verticilloides</i>                      | FVEG_07298.3 (FGI) <sup>1</sup> |       | Ma <i>et al.</i> 2010           |
| A     | <i>Gibberella fujikuroi</i> m567                    | CAA62232                        |       | Tudzynski <i>et al.</i> 1996    |
| A     | <i>Gibberella zeae</i> PH-1                         | XP_382123 <sup>1</sup>          | FGI   | Ma <i>et al.</i> 2010           |
| A     | <i>Leptosphaeria maculans</i>                       | P36842                          |       | Williams <i>et al.</i> 1995     |
| A     | <i>Magnaporthe grisea</i> 70-15                     | EDJ96311                        | FGI   | Dean <i>et al.</i> 2005         |
| A     | <i>Metarhizium anisopliae</i> ME1                   | CAA04554                        |       | Screen <i>et al.</i> 1998       |
| A     | <i>Microsporum canis</i> CBS 113480                 | EEQ28849                        | FGI   | DCSP                            |
| A     | <i>Microsporum gypseum</i> CBS 118893               | MGYG_04402.1 (FGI)              | FGI   | DCSP                            |
| A     | <i>Monascus purpureus</i>                           | BAB84515                        |       |                                 |
| A     | <i>Myceliophthora thermophila</i> ATCC42464         | 97565 (JGI)                     | JGI   |                                 |
| A     | <i>Mycosphaerella fijiensis</i>                     | 56303 (JGI)                     | JGI   |                                 |
| A     | <i>Mycosphaerella graminicola</i>                   | 111003 (JGI)                    | JGI   |                                 |
| A     | <i>Nectria haematococca</i> mpVI 77-13-4            | EEU34169                        | JGI   | Coleman <i>et al.</i> 2009      |
| A     | <i>Neosartorya fischeri</i> NRRL181                 | EAW22584                        | JCVI  | Fedorova <i>et al.</i> 2008     |
| A     | <i>Neurospora crassa</i> 74OR23-1A                  | CAA43600                        |       | Okamoto <i>et al.</i> 1991      |
| A     | <i>Neurospora crassa</i> OR74A                      | EAA32833                        | FGI   | Galagan <i>et al.</i> 2003      |
| A     | <i>Neurospora discreta</i> FGSC8579 mat A           | 128588 (JGI) <sup>1</sup>       | JGI   |                                 |
| A     | <i>Neurospora tetrasperma</i> FGSC2508 matA         | 124300 (JGI) <sup>1</sup>       | JGI   |                                 |
| A     | <i>Paracoccidioides brasiliensis</i> Pb03           | EEH17834                        | FGI   | PbSP                            |
| A     | <i>Paracoccidioides brasiliensis</i> Pb18           | EEH46709 <sup>1</sup>           | FGI   | PbSP                            |
| A     | <i>Penicillium camemberti</i> CECT2267              | ACI29313                        |       | Navarrete <i>et al.</i> 2009    |
| A     | <i>Penicillium chrysogenum</i>                      | AAB03900                        |       | Haas and Marzluf 1995           |
| A     | <i>Penicillium chrysogenum</i> Wisconsin 54-1255    | CAP92210                        |       | van den Berg <i>et al.</i> 2008 |
| A     | <i>Penicillium griseoroseum</i>                     | AAP12556                        |       | Pereira <i>et al.</i> 2004      |

|    |                                              |                           |      |                                |
|----|----------------------------------------------|---------------------------|------|--------------------------------|
| A  | <i>Penicillium marneffei</i> ATCC 18224      | EEA25715                  | JCVI |                                |
| A  | <i>Phaeosphaeria nodorum</i> BS171           | CAA08857                  |      | Cutler <i>et al.</i> 1998      |
| A  | <i>Phaeosphaeria nodorum</i> BSm300          | CAA74005                  |      | Cutler <i>et al.</i> 1998      |
| A  | <i>Phaeosphaeria nodorum</i> SN15            | EAT87086                  | FGI  |                                |
| A  | <i>Pichia angusta</i> NCYC495                | CAA88925                  |      | Avila <i>et al.</i> 1995       |
| A  | <i>Podospira anserina</i> DSM980             | CAP70343                  | GS   | Espagne <i>et al.</i> 2008     |
| A  | <i>Sclerotinia sclerotiorum</i> 1980         | EDN96957                  | FGI  |                                |
| A  | <i>Sordaria macrospora</i> k-hell            | CBI54944                  | RUB  | Nowrousian <i>et al.</i> 2010  |
| A  | <i>Talaromyces stipitatus</i> ATCC 10500     | EED21598                  | JCVI |                                |
| A  | <i>Thielavia terrestris</i>                  | 36169 (JGI)               | JGI  |                                |
| A  | <i>Trichoderma atroviride</i>                | 128887 (JGI) <sup>1</sup> | JGI  |                                |
| A  | <i>Trichoderma reesei</i>                    | 81955 (JGI) <sup>1</sup>  | JGI  | Martinez <i>et al.</i> 2008    |
| A  | <i>Trichoderma virens</i> Gv29-8             | 33018 (JGI)               | JGI  |                                |
| A  | <i>Trichophyton equinum</i> CBS127.97        | TEQG_08349.1 (FGI)        | FGI  | DCSP                           |
| A  | <i>Trichophyton rubrum</i> CBS118892         | TERG_07816.2 (FGI)        | FGI  | DCSP                           |
| A  | <i>Trichophyton tonsurans</i> CBS112818      | TESG_00729.1 (FGI)        | FGI  | DCSP                           |
| A  | <i>Trichophyton verrucosum</i> HKI 0517      | EFE41244                  | HKI  | DCSP                           |
| A  | <i>Tuber borchii</i>                         | AAN64993                  |      | Guescini <i>et al.</i> 2003    |
| A  | <i>Tuber melanosporum</i> Mel28              | CAZ85382 <sup>1</sup>     | GS   | Martin <i>et al.</i> 2010      |
| A  | <i>Verticillium albo-atrum</i> VaMs.102      | EEY14658                  | FGI  |                                |
| A  | <i>Verticillium dahliae</i> VdLs.17          | VDAG_00378 (FGI)          | FGI  |                                |
| A  | <i>Verticillium fungicola</i> 150-1          | AAO63560                  |      | Amey <i>et al.</i> 2007        |
| A  | <i>Wickerhamomyces anomalus</i> CECT1112     | AAF28059                  |      | Garcia-Lugo <i>et al.</i> 2000 |
| B  | <i>Coprinopsis cinerea</i> okayama 7*130     | EAU81300                  | FGI  | Stajich <i>et al.</i> 2010     |
| B  | <i>Hebeloma cylindrosporum</i> h1            | CAB60010                  |      | Jargeat <i>et al.</i> 2000     |
| B  | <i>Laccaria bicolor</i> S238N-H82            | EDR02368                  | JGI  | Martin <i>et al.</i> 2008      |
| B  | <i>Melampsora larici-populina</i> 98AG31_300 | 33678 (JGI)               | JGI  |                                |
| B  | <i>Oryza sativa</i> EST1                     | translated from AK110249  |      | Kikuchi <i>et al.</i> 2003     |
| B  | <i>Phanerochaete chrysosporium</i>           | 136276 (JGI) <sup>1</sup> | JGI  | Martinez <i>et al.</i> 2004    |
| B  | <i>Postia placenta</i> MAD-698               | 47370 (JGI) <sup>1</sup>  | JGI  | Martinez <i>et al.</i> 2009    |
| B  | <i>Sporobolomyces roseus</i>                 | 34275 (JGI)               | JGI  |                                |
| B  | <i>Ustilago maydis</i> 521                   | EAK84753                  | FGI  | Kamper <i>et al.</i> 2006      |
| M  | <i>Mucor circinelloides</i> CBS277.49        | 81522 (JGI)               | JGI  |                                |
| O  | <i>Phytophthora infestans</i>                | P39864                    |      | Pieterse <i>et al.</i> 1995    |
| O  | <i>Phytophthora ramorum</i>                  | 71442 (JGI)               | JGI  | Tyler <i>et al.</i> 2006       |
| O  | <i>Phytophthora sojae</i>                    | 140563 (JGI)              | JGI  | Tyler <i>et al.</i> 2006       |
| Bp | <i>Cylindrotheca fusiformis</i>              | AAV59538                  | JGI  | Poulsen and Kroger 2005        |
| Bp | <i>Phaeodactylum tricorutum</i> CCAP 1055/1  | EEC44781                  | JGI  | Bowler <i>et al.</i> 2008      |
| Bp | <i>Thalassiosira pseudonana</i> CCMP1335     | EED88244                  | JGI  | Armbrust <i>et al.</i> 2004    |

**Supplementary Table 3** Published full-length or nearly full-length nitrate reductase sequences used in our study

Phyl.: phylum or subphylum (A: Ascomycota, B: Basidiomycota, M: Mucoromycotina, O: Oomycota, Bp: Bacillariophyta)

Acc.Nr.: Protein ID at NCBI or the webportals of genome sequencing consortia (JGI: DOE Joint Genome Institute; FGI: Fungal Genome Initiative at the Broad Institute)

Cons.: Sequencing consortium when data were obtained from whole genome sequencing projects (DSM: DSM, Delft, The Netherlands; FGI: Fungal Genome Initiative, Broad Institute, MA, USA; GS: Genoscope, France; HKI: Leibniz Institute for Natural Product Research and Infection Biology - Hans-Knöll-Institute, Germany; JCVI: J. Craig Venter Institute, MD, USA; JGI: US DOE Joint Genome Initiative, CA, USA; RUB: Ruhr-Universität Bochum, Germany; TIGR: The Institute for Genomic Research, MD, USA)

<sup>1</sup>: Protein sequences for multiple alignments were manually edited based on the corresponding genomic sequence.

### Supplementary References

- ACSP *Aspergillus* Comparative Sequencing Project, Broad Institute of Harvard and MIT (<http://www.broadinstitute.org/>).
- Amev R, Athey-Pollard A, Mills P, Foster G, Bailey A (2007). Investigations into the taxonomy of the mushroom pathogen *Verticillium fungicola* and its relatives based on sequence analysis of nitrate reductase and ITS regions. *Microbiology* 76: 757-768.
- Armbrust EV, Berges JA, Bowler C, Green BR, Martinez D, Putnam NH *et al* (2004). The genome of the diatom *Thalassiosira pseudonana*: ecology, evolution, and metabolism. *Science* 306: 79-86.
- Avila J, Perez MD, Brito N, Gonzalez C, Siverio JM (1995). Cloning and disruption of the *YNR1* gene encoding the nitrate reductase apoenzyme of the yeast *Hansenula polymorpha*. *FEBS Lett* 366: 137-142.
- Baker SE (2006). *Aspergillus niger* genomics: past, present and into the future. *Med Mycol* 44 Suppl 1: S17-21.
- BDSP *Blastomyces dermatitidis* Sequencing Project, Broad Institute of Harvard and MIT (<http://www.broadinstitute.org/>).
- Boer E, Schroter A, Bode R, Piontek M, Kunze G (2009). Characterization and expression analysis of a gene cluster for nitrate assimilation from the yeast *Arxula adenivorans*. *Yeast* 26: 83-93.
- Bowler C, Allen AE, Badger JH, Grimwood J, Jabbari K, Kuo A *et al* (2008). The *Phaeodactylum* genome reveals the evolutionary history of diatom genomes. *Nature* 456: 239-244.
- Chang PK, Ehrlich KC, Linz JE, Bhatnagar D, Cleveland TE, Bennett JW (1996). Characterization of the *Aspergillus parasiticus niaD* and *niiA* gene cluster. *Curr Genet* 30: 68-75.
- Coleman JJ, Rounsley SD, Rodriguez-Carres M, Kuo A, Wasmann CC, Grimwood J *et al* (2009). The genome of *Nectria haematococca*: contribution of supernumerary chromosomes to gene expansion. *PLoS Genet* 5: e1000618.
- Cutler SB, Cooley RN, Caten CE (1998). Cloning of the nitrate reductase gene of *Stagonospora (Septoria) nodorum* and its use as a selectable marker for targeted transformation. *Curr Genet* 34: 128-137.
- DCSP Dermatophyte Comparative Sequencing Project, Broad Institute of Harvard and MIT (<http://www.broadinstitute.org/>).
- Dean RA, Talbot NJ, Ebbole DJ, Farman ML, Mitchell TK, Orbach MJ *et al* (2005). The genome sequence of the rice blast fungus *Magnaporthe grisea*. *Nature* 434: 980-986.
- Dioloz A, Langin T, Gerlinger C, Brygoo Y, Daboussi MJ (1993). The *nia* gene of *Fusarium oxysporum*: isolation, sequence and development of a homologous transformation system. *Gene* 131: 61-67.
- Espagne E, Lespinet O, Malagnac F, Da Silva C, Jaillon O, Porcel BM *et al* (2008). The genome sequence of the model ascomycete fungus *Podospira anserina*. *Genome Biol* 9: R77.
- Fedorova ND, Khaldi N, Joardar VS, Maiti R, Amedeo P, Anderson MJ *et al* (2008). Genomic islands in the pathogenic filamentous fungus *Aspergillus fumigatus*. *PLoS Genet* 4: e1000046.
- Fujii T, Takaya N (2008). Denitrification by the fungus *Fusarium oxysporum* involves NADH-nitrate reductase. *Biosci Biotechnol Biochem* 72: 412-420.
- Galagan JE, Calvo SE, Borkovich KA, Selker EU, Read ND, Jaffe D *et al* (2003). The genome sequence of the filamentous fungus *Neurospora crassa*. *Nature* 422: 859-868.
- Galagan JE, Calvo SE, Cuomo C, Ma LJ, Wortman JR, Batzoglou S *et al* (2005). Sequencing of *Aspergillus nidulans* and comparative analysis with *A. fumigatus* and *A. oryzae*. *Nature* 438: 1105-1115.
- Garcia-Lugo P, Gonzalez C, Perdomo G, Brito N, Avila J, de La Rosa JM *et al* (2000). Cloning, sequencing, and expression of *H.a.YNR1* and *H.a.YNII*, encoding nitrate and nitrite reductases in the yeast *Hansenula anomala*. *Yeast* 16: 1099-1105.
- Guescini M, Pierleoni R, Palma F, Zeppa S, Vallorani L, Potenza L *et al* (2003). Characterization of the *Tuber borchii* nitrate reductase gene and its role in ectomycorrhizae. *Mol Genet Genomics* 269: 807-816.

- Haas H, Marzluf GA (1995). NRE, the major nitrogen regulatory protein of *Penicillium chrysogenum*, binds specifically to elements in the intergenic promoter regions of nitrate assimilation and penicillin biosynthetic gene clusters. *Curr Genet* 28: 177-183.
- Jargeat P, Gay G, Debaud JC, Marmeisse R (2000). Transcription of a nitrate reductase gene isolated from the symbiotic basidiomycete fungus *Hebeloma cylindrosporium* does not require induction by nitrate. *Mol Gen Genet* 263: 948-956.
- Kamper J, Kahmann R, Bolker M, Ma LJ, Brefort T, Saville BJ *et al* (2006). Insights from the genome of the biotrophic fungal plant pathogen *Ustilago maydis*. *Nature* 444: 97-101.
- Kikuchi S, Satoh K, Nagata T, Kawagashira N, Doi K, Kishimoto N *et al* (2003). Collection, mapping, and annotation of over 28,000 cDNA clones from japonica rice. *Science* 301: 376-379.
- Kitamoto N, Kimura T, Kito Y, Ohmiya K, Tsukagoshi N (1995). The nitrate reductase gene from a shoyo koji mold, *Aspergillus oryzae* KBN616. *Biosci Biotechnol Biochem* 59: 1795-1797.
- Levis C, Fortini D, Brygoo Y (1997). Transformation of *Botrytis cinerea* with the nitrate reductase gene (*niaD*) shows a high frequency of homologous recombination. *Curr Genet* 32: 157-162.
- Ma L-J, van der Does HC, Borkovich KA, Coleman JJ, Daboussi M-J, Di Pietro A *et al* (2010). Comparative genomics reveals mobile pathogenicity chromosomes in *Fusarium*. *Nature* 464: 367-373.
- Martin F, Aerts A, Ahren D, Brun A, Danchin EG, Duchaussoy F *et al* (2008). The genome of *Laccaria bicolor* provides insights into mycorrhizal symbiosis. *Nature* 452: 88-92.
- Martin F, Kohler A, Murat C, Balestrini R, Coutinho PM, Jaillon O *et al* (2010). Perigord black truffle genome uncovers evolutionary origins and mechanisms of symbiosis. *Nature* 464: 1033-1038.
- Martinez D, Larrondo LF, Putnam N, Gelpke MD, Huang K, Chapman J *et al* (2004). Genome sequence of the lignocellulose degrading fungus *Phanerochaete chrysosporium* strain RP78. *Nat Biotechnol* 22: 695-700.
- Martinez D, Berka RM, Henrissat B, Saloheimo M, Arvas M, Baker SE *et al* (2008). Genome sequencing and analysis of the biomass-degrading fungus *Trichoderma reesei* (syn. *Hypocrea jecorina*). *Nat Biotechnol* 26: 553-560.
- Martinez D, Challacombe J, Morgenstern I, Hibbett D, Schmoll M, Kubicek CP *et al* (2009). Genome, transcriptome, and secretome analysis of wood decay fungus *Postia placenta* supports unique mechanisms of lignocellulose conversion. *PNAS* 106: 1954-1959.
- Maurer P, Rejasse A, Capy P, Langin T, Riba G (1997). Isolation of the transposable element hupfer from the entomopathogenic fungus *Beauveria bassiana* by insertion mutagenesis of the nitrate reductase structural gene. *Mol Gen Genet* 256: 195-202.
- Navarrete K, Roa A, Vaca I, Espinosa Y, Navarro C, Chavez R (2009). Molecular characterization of the *niaD* and *pyrG* genes from *Penicillium camemberti*, and their use as transformation markers. *Cell Mol Biol Lett* 14: 692-702.
- Nierman WC, Pain A, Anderson MJ, Wortman JR, Kim HS, Arroyo J *et al* (2005). Genomic sequence of the pathogenic and allergenic filamentous fungus *Aspergillus fumigatus*. *Nature* 438: 1151-1156.
- Nowrousian M, Stajich JE, Chu M, Engh I, Espagne E, Halliday K *et al* (2010). *De novo* assembly of a 40 Mb eukaryotic genome from short sequence reads: *Sordaria macrospora*, a model organism for fungal morphogenesis. *PLoS Genet* 6: e1000891.
- Okamoto PM, Fu YH, Marzluf GA (1991). *Nit-3*, the structural gene of nitrate reductase in *Neurospora crassa*: nucleotide sequence and regulation of mRNA synthesis and turnover. *Mol Gen Genet* 227: 213-223.
- PbSP *Paracoccidioides brasiliensis* Sequencing Project, Broad Institute of Harvard and MIT (<http://www.broadinstitute.org/>).
- Pel HJ, de Winde JH, Archer DB, Dyer PS, Hofmann G, Schaap PJ *et al* (2007). Genome sequencing and analysis of the versatile cell factory *Aspergillus niger* CBS 513.88. *Nat Biotechnol* 25: 221-231.

Pereira JF, de Queiroz MV, Lopes FJ, Rocha RB, Daboussi MJ, de Araujo EF (2004). Characterization, regulation, and phylogenetic analyses of the *Penicillium griseoroseum* nitrate reductase gene and its use as selection marker for homologous transformation. *Can J Microbiol* 50: 891-900.

Pieterse CM, van't Klooster J, van den Berg-Velthuis GC, Govers F (1995). *NiaA*, the structural nitrate reductase gene of *Phytophthora infestans*: isolation, characterization and expression analysis in *Aspergillus nidulans*. *Curr Genet* 27: 359-366.

Poulsen N, Kroger N (2005). A new molecular tool for transgenic diatoms: control of mRNA and protein biosynthesis by an inducible promoter-terminator cassette. *FEBS J* 272: 3413-3423.

Screen S, Bailey A, Charnley K, Cooper R, Clarkson J (1998). Isolation of a nitrogen response regulator gene (*nrr1*) from *Metarhizium anisopliae*. *Gene* 221: 17-24.

Stajich JE, Wilke SK, Ahren D, Au CH, Birren BW, Borodovsky M *et al* (2010). Insights into evolution of multicellular fungi from the assembled chromosomes of the mushroom *Coprinopsis cinerea* (*Coprinus cinereus*). *PNAS* 107: 11889-11894.

Tudzynski B, Mende K, Weltring KM, Kinghorn JR, Unkles SE (1996). The *Gibberella fujikuroi niaD* gene encoding nitrate reductase: isolation, sequence, homologous transformation and electrophoretic karyotype location. *Microbiology* 142 ( Pt 3): 533-539.

Tyler BM, Tripathy S, Zhang X, Dehal P, Jiang RH, Aerts A *et al* (2006). *Phytophthora* genome sequences uncover evolutionary origins and mechanisms of pathogenesis. *Science* 313: 1261-1266.

Unkles SE, Campbell EI, Punt PJ, Hawker KL, Contreras R, Hawkins AR *et al* (1992). The *Aspergillus niger niaD* gene encoding nitrate reductase: upstream nucleotide and amino acid sequence comparisons. *Gene* 111: 149-155.

van den Berg MA, Albang R, Albermann K, Badger JH, Daran JM, Driessen AJ *et al* (2008). Genome sequencing and analysis of the filamentous fungus *Penicillium chrysogenum*. *Nat Biotechnol* 26: 1161-1168.

Williams RS, Davis MA, Howlett BJ (1995). The nitrate and nitrite reductase-encoding genes of *Leptosphaeria maculans* are closely linked and transcribed in the same direction. *Gene* 158: 153-154.
